# Supplementary material for: Lateral Flow Immunoassay Based on Time-Resolved Fluorescence Microspheres for Rapid and Quantitative Screening CA199 in Human Serum
Source: MDPI journal article supplement (doi:10.3390/ijms23179991), 2022-09-01
Supplement: s1 [file s1]

# **Supplementary Information**

## **Lateral flow immunoassay based on time-resolved fluorescence microspheres for rapid and quantitative screening CA199 in human serum**

Xueshima Jiao<sup>a,b,#</sup>, Tao Peng<sup>b,#</sup>, Zhanwei Liang<sup>a,b</sup>, Yalin Hu<sup>a,b</sup>, Bo Meng<sup>b</sup>, Yang Zhao<sup>b</sup>,  
Jie Xie<sup>b</sup>, Xiaoyun Gong<sup>b</sup>, You Jiang<sup>b</sup>, Xiang Fang<sup>b</sup>, Xiaoping Yu<sup>a,\*</sup>, Xinhua Dai<sup>b,\*</sup>

<sup>a</sup> *College of Life Sciences, China Jiliang University, Hangzhou, 310018, PR China*

<sup>b</sup> *Center for Advanced Measurement Science, National Institute of Metrology, Beijing  
100029, PR China*

# These authors contributed equally to this work.

\* Corresponding author. Tel: +86 010 64524208; fax: +86 010 64524962

E-mail address: daixh@nim.ac.cn

yxp@cjl.u.edu.cn

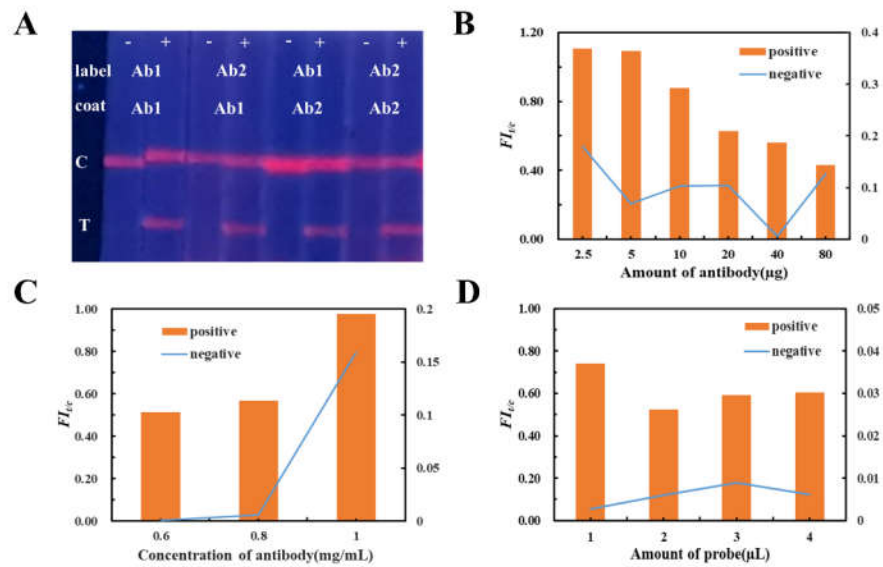

**Figure S1.** Optimized results of Ab1 and Ab2 roles in the LFIA (A), Ab1 amount used to prepare detection probes (B), Ab2 concentration coated on T line (C), and detection probes volume loaded on conjugated pad (D).

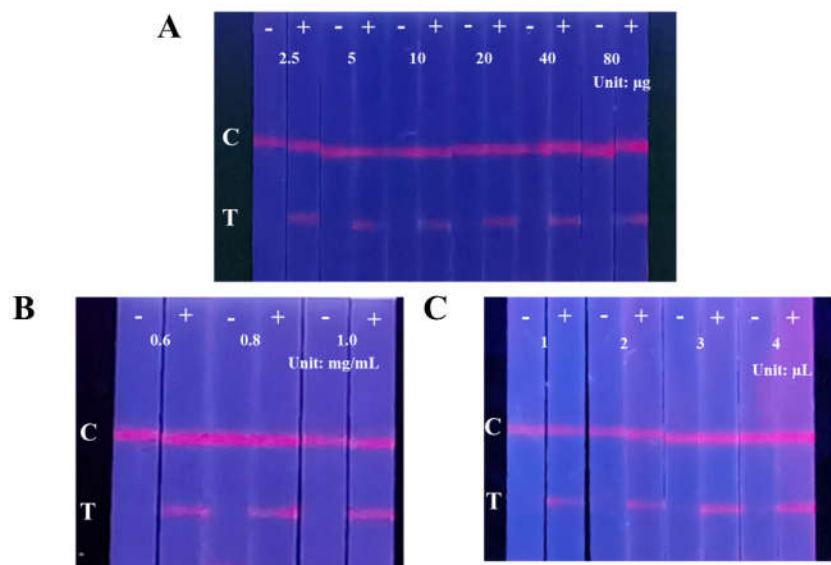

**Figure S2.** Optimization of (A) the Ab1 in the probe, (B) the Ab2 on the test line, and (C) different probe volumes of 1, 2, 3 and 4  $\mu\text{L}$ .

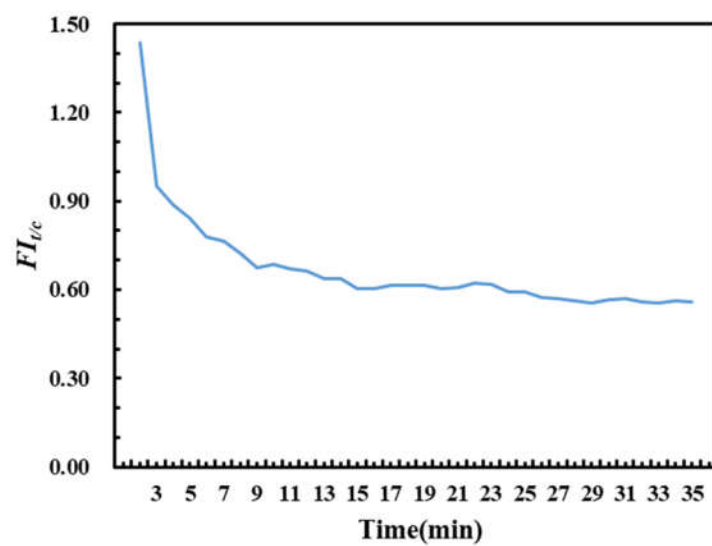

**Figure S3.** Immunological kinetics analysis of the TRFM-based LFIA for testing 33 U/mL of CA199 in serum

**Table S1.** The specificity comparison of LFIA strip by different antigens.

| Antigens                    | $FT_t$ | $FT_c$ | $FT_{t/c}$ |
|-----------------------------|--------|--------|------------|
| Blank serum                 | 0.008  | 16.238 | 0.000      |
| 33 U/mL of CA199            | 6.975  | 18.739 | 0.372      |
| 1.0 $\mu\text{g/mL}$ of CEA | 0.078  | 16.982 | 0.005      |
| 100 $\mu\text{g/mL}$ of CEA | 0.000  | 16.907 | 0.000      |
| 1.0 $\mu\text{g/mL}$ of AFP | 0.000  | 17.944 | 0.000      |
| 73 $\mu\text{g/mL}$ of AFP  | 0.000  | 17.520 | 0.000      |

**Table S2.** Detection results of CA199 in serum samples of liver cancer patients and healthy people by the TRFM-based LFIA.

| Serum samples         |    | $FT_t$ | $FT_c$ | $FT_{t/c}$ | CA199 Concentration (U/mL) |
|-----------------------|----|--------|--------|------------|----------------------------|
| Liver cancer patients | 1  | 12.476 | 19.117 | 0.653      | 23.04                      |
|                       | 2  | 15.515 | 16.383 | 0.947      | 37.48                      |
|                       | 3  | 0.225  | 10.983 | 0.020      | 0.00                       |
|                       | 4  | 13.241 | 17.611 | 0.752      | 27.91                      |
|                       | 5  | 13.883 | 18.421 | 0.754      | 27.99                      |
|                       | 6  | 1.148  | 10.678 | 0.108      | 0.00                       |
|                       | 7  | 10.460 | 13.468 | 0.777      | 29.13                      |
|                       | 8  | 9.672  | 16.313 | 0.593      | 20.12                      |
|                       | 9  | 2.007  | 10.743 | 0.187      | 0.21                       |
|                       | 10 | 7.688  | 17.609 | 0.437      | 12.46                      |
| Healthy people        | 11 | 0.000  | 13.838 | 0.000      | 0.00                       |
|                       | 12 | 3.265  | 16.51  | 0.198      | 0.75                       |
|                       | 13 | 8.954  | 19.738 | 0.454      | 13.29                      |
|                       | 14 | 6.670  | 13.207 | 0.505      | 15.81                      |
|                       | 15 | 9.997  | 17.141 | 0.583      | 19.64                      |
|                       | 16 | 2.952  | 17.925 | 0.165      | 0.00                       |
|                       | 17 | 5.528  | 16.227 | 0.341      | 7.75                       |
|                       | 18 | 2.860  | 15.532 | 0.184      | 0.08                       |
|                       | 19 | 3.853  | 21.309 | 0.181      | 0.00                       |
|                       | 20 | 7.722  | 18.392 | 0.420      | 11.64                      |
